# Supplementary material for: Comprehensive assessment of 11 de novo HiFi assemblers on complex eukaryotic genomes and metagenomes
Source: HighWire-hosted journal article supplement (doi:10.1101/gr.278232.123), 2024-02-01
Supplement: Supplemental_Custom_Scripts.docx [file Supplemental_Custom_Scripts.docx]

**1. This is the code to evaluate simulated genome assembly results based on kmer (include CR, SCR, DCR, APLC, ADF)**

# -*- coding: UTF-8 -*-

import argparse

import time

from pandas import *

from random import *

import os

def ArgParse():

group = argparse.ArgumentParser(description='A python script for genome assessment.')

group.add_argument('-i', '--input', help='assemble result with fasta format.', required=True)

group.add_argument('-r', '--reference', help='reference sequence with fasta format.', required=True)

group.add_argument('-k', '--kmer-length', type=int, help='the kmer length used in assessment, default=21.',default=21)

group.add_argument('-o', '--out-prefix',help='prefix of output files.',required=True)

group.add_argument('-s', '--sample', help='the number of ref unique kmer sampled, default=all.', default="all")

return group.parse_args()

def integrateReadLine(fa, prefix):

file_name = fa.split("/")[-1]

fi = open(fa, "r")

lines = fi.readlines()

fi.close()

fo = open(prefix + "_" + file_name, "w")

n = "1"

for line in lines:

if line[0] == ">":

if n == "1":

fo.write(line)

else:

fo.write("\n" + line)

else:

n = "larger than 1"

line = line.strip()

fo.write(line)

fo.close()

print("[INFO] " + time.strftime("%Y-%m-%d %H:%M:%S",time.localtime()) + ", " + "Integrate read lines in " + fa + " file done.")

def reverseCompleKmer(kmer):

reverse_complementary_kmer_list = []

base_dic = {"A":"T","T":"A","C":"G","G":"C","N":"N","a":"T","t":"A","c":"G","g":"C","n":"N"}

for base in list(kmer[::-1]):

reverse_complementary_kmer_list.append(base_dic[base])

reverse_complementary_kmer = "".join(reverse_complementary_kmer_list)

return min([kmer.upper(), reverse_complementary_kmer.upper()])

def refUniqueKmerSearch(ref, kmer_length):

fi = open(ref, "r")

lines = fi.readlines()

fi.close()

sumKmer_dic = {}

for line in lines:

line = line.strip()

if line[0] != ">":

for i in range(len(line) - kmer_length + 1):

sumKmer_dic[reverseCompleKmer(line[i:i + kmer_length])] = sumKmer_dic.get(

reverseCompleKmer(line[i:i + kmer_length]), 0) + 1

unique_kmer = {}

for key, value in sumKmer_dic.items():

if value == 1:

unique_kmer[key] = 0

external_dic = {}

internal_dic = {}

chr_name = ""

for line in lines:

line = line.strip().split()[0]

if line != "":

if line[0] == ">":

chr_name = line[1:]

internal_dic = {}

else:

for i in range(len(line) - kmer_length + 1):

kmer = line[i:i + kmer_length]

kmer = reverseCompleKmer(kmer)

if kmer in unique_kmer.keys():

internal_dic[kmer] = (i + 1, i + kmer_length)

external_dic[chr_name] = internal_dic

refChr_uniKmer = {}

for K, V in external_dic.items():

mydic = {}

for key, value in V.items():

if key in unique_kmer:

mydic[key] = 1

refChr_uniKmer[K] = mydic # refChr_uniKmer = {"chr01":{"ATCG":1,...,"ATCG":1}...}

print("[INFO] " + time.strftime("%Y-%m-%d %H:%M:%S",time.localtime()) + ", " + "Unique kmer count in " + ref + " file done.")

with open("refUniKmer", "w") as fi:

fi.write("{}\t{}\t{}\t{}\n".format("Chr", "Kmer", "Start", "End"))

for key, value in external_dic.items():

for k, v in value.items():

fi.write("{}\t{}\t{}\t{}\n".format(key, k, v[0], v[1]))

fi.write("\n")

fi.close()

return [refChr_uniKmer, unique_kmer]

def getRefUniKmerPos(ref, kmer_length):

eachchr_unikmer = refUniqueKmerSearch(ref, kmer_length)[0]

data = open(ref, "r")

lines = data.readlines()

data.close()

kmerpos_dic = {}

chr_name = ""

for line in lines:

line = line.strip().split()[0]

if line[0] == ">":

chr_name = line[1:]

kmerpos_dic[chr_name] = {}

for line in lines:

line = line.strip().split()[0]

if line[0] == ">":

chr_name = line[1:]

else:

for i in range(len(line) - kmer_length + 1):

if reverseCompleKmer(line[i:i + kmer_length]) in eachchr_unikmer[chr_name].keys():

kmerpos_dic[chr_name][(i + 1, i + kmer_length)] = 0

print("[INFO] " + time.strftime("%Y-%m-%d %H:%M:%S",time.localtime()) + ", " + "Get reference unique kmer position done.")

return kmerpos_dic # kmerpos_dic={"chr1":{(1,21):0,...,(41,51):0},...}

def removeOverlapKmer(classed_kmer_dic):

set_option('display.max_columns', None)

set_option('display.max_rows', None)

external_dic = {}

internal_dic = {}

for key, value in classed_kmer_dic.items():

internal_dic = {}

value_list = list(value.items())

value_list.sort(key=lambda x: x[0][0], reverse=False)

mydic = {}

mydic["start_pos"] = [value_list[0][0][0]]

mydic["end_pos"] = [value_list[0][0][1]]

mydic["front_end_pos"] = [0]

last_end_pos = value_list[0][0][1]

for i in range(1,len(value_list)):

mydic["start_pos"].append(value_list[i][0][0])

mydic["end_pos"].append(value_list[i][0][1])

mydic["front_end_pos"].append(last_end_pos)

last_end_pos = value_list[i][0][1]

mydataframe = DataFrame(mydic)

mydataframe = mydataframe[(mydataframe["front_end_pos"] - mydataframe["start_pos"]) < 0]

for i in mydataframe.index:

internal_dic[(mydataframe["start_pos"][i],mydataframe["end_pos"][i])] = 0

external_dic[key] = internal_dic

print("[INFO] " + time.strftime("%Y-%m-%d %H:%M:%S", time.localtime()) + ", " + "Remove overlaps between kmers done.")

return external_dic #external_dic{"chr/ctg":{(1,21):0,...,(31,51):0},...}

def getHeaderKmer(fasta, headerkmerpos_dic, kmer_length):

data = open(fasta, "r")

lines = data.readlines()

data.close()

kmer_pos_dic = {}

seqname_kmer_dic = {}

sequence_name = ""

for line in lines:

line = line.strip().split()[0]

if line[0] == ">":

sequence_name = line[1:]

kmer_pos_dic = {}

else:

for key, value in headerkmerpos_dic.items():

if sequence_name == key:

for pos in value.keys():

kmer_pos_dic[reverseCompleKmer(line[pos[0] - 1:pos[0] + kmer_length - 1])] = []

seqname_kmer_dic[sequence_name] = kmer_pos_dic

for line in lines:

line = line.strip().split()[0]

if line[0] == ">":

sequence_name = line[1:]

else:

for key, value in headerkmerpos_dic.items():

if sequence_name == key:

for pos in value:

seqname_kmer_dic[sequence_name][reverseCompleKmer(line[pos[0] - 1: pos[0] + kmer_length - 1])].append(pos)

print("[INFO] " + time.strftime("%Y-%m-%d %H:%M:%S", time.localtime()) + ", " + "Get header kmer done.")

return seqname_kmer_dic # seqname_kmer_dic={"chr/ctg":{"ATCG":[(1,21),...,(31,51)]},...}

def randomselectkmer(refkmerdic,sample_num):

kmerdic = {}

for key,value in refkmerdic.items():

for k,v in value.items():

kmerdic[k] = 0

seed(111)

mylist = sample(list(kmerdic.items()),sample_num)

newkmerdic = {}

for i in mylist:

newkmerdic[i[0]] = 0

external_dic = {}

for key,value in refkmerdic.items():

internal_dic = {}

for k,v in value.items():

if k in newkmerdic.keys():

internal_dic[k] = v

external_dic[key] = internal_dic

print("[INFO] " + time.strftime("%Y-%m-%d %H:%M:%S", time.localtime()) + ", random select 200000 reference kmer done.")

return external_dic # external_dic={"chr/ctg":{"ATCG":[(1,21),...,(31,51)]},...}

def getAsbkmer(ctgfile,reffile,refkmer_dic,kmer_length):

refkmer = {}

for key,value in refkmer_dic.items():

for k,v in value.items():

refkmer[k] = 0

file = open(ctgfile,"r")

lines = file.readlines()

file.close()

external_dic = {}

internal_dic = {}

ctgname = ""

for line in lines:

line = line.strip().split()[0]

if line[0] == ">":

ctgname = line[1:]

internal_dic = {}

else:

for i in range(len(line) - kmer_length + 1):

if reverseCompleKmer(line[i:i + kmer_length]) in refkmer.keys():

internal_dic[reverseCompleKmer(line[i:i + kmer_length])] = internal_dic.get(reverseCompleKmer(line[i:i + kmer_length]),[]) + [(i + 1, i + kmer_length)]

external_dic[ctgname] = internal_dic

print("[INFO] " + time.strftime("%Y-%m-%d %H:%M:%S",time.localtime()) + ", " + "Unique kmer from " + reffile + " file count in " + ctgfile + " file done.")

return external_dic # external_dic={"chr/ctg":{"ATCG":[(1,21),...,(31,51)]},...}

def assembleAssessment(ref_fa, asb_fa, kmer_length, sample_num, prefix):

print("[INFO] " + time.strftime("%Y-%m-%d %H:%M:%S", time.localtime()) + ", Begin.")

integrateReadLine(ref_fa, prefix)

integrateReadLine(asb_fa, prefix)

refUniKmerPos = getRefUniKmerPos(prefix + "_" + ref_fa.split("/")[-1], kmer_length)

refHeaderKmerPos = removeOverlapKmer(refUniKmerPos)

refUniKmerPos = None

if sample_num == "all":

refHeaderKmer = getHeaderKmer(prefix + "_" + ref_fa.split("/")[-1], refHeaderKmerPos, kmer_length)

else:

refheaderKmer = getHeaderKmer(prefix + "_" + ref_fa.split("/")[-1], refHeaderKmerPos, kmer_length)

refHeaderKmer = randomselectkmer(refheaderKmer,int(sample_num))

refheaderkmer = None

refHeaderKmerPos = None

asbHeaderKmer = getAsbkmer(prefix + "_" + asb_fa.split("/")[-1],prefix + "_" + ref_fa.split("/")[-1],refHeaderKmer,kmer_length)

with open("random_refHeaderkmer.dic","w") as file:

file.write(str(refHeaderKmer))

file.close()

with open("refHeaderkmer.out", "w") as file:

file.write("Chr\tKmer\tStart\tEnd\n")

for key, value in refHeaderKmer.items():

for k, v in value.items():

file.write("{}\t{}\t{}\t{}\n".format(key, k, v[0][0], v[0][1]))

file.write("\n")

file.close()

with open("asbHeaderkmer.out", "w") as file:

file.write("Contig\tKmer\tStart\tEnd\n")

for key, value in asbHeaderKmer.items():

for k, v in value.items():

for i in v:

file.write("{}\t{}\t{}\t{}\n".format(key, k, i[0], i[1]))

file.write("\n")

file.close()

asbKmerCount = {}

for Key, Value in asbHeaderKmer.items():

for k, v in Value.items():

asbKmerCount[k] = asbKmerCount.get(k, 0) + len(v)

singleCopyKmerNum = 0

duplicateKmerNum = 0

colKmerNum = 0

for key, value in refHeaderKmer.items():

for k, v in value.items():

colKmerNum += 1

for key, value in asbKmerCount.items():

if value == 1:

singleCopyKmerNum += 1

else:

duplicateKmerNum += 1

singleCopy = singleCopyKmerNum / colKmerNum

print("[INFO] " + time.strftime("%Y-%m-%d %H:%M:%S", time.localtime()) + ", " + "Compute single copy rate done.")

duplicateRate = duplicateKmerNum / colKmerNum

print("[INFO] " + time.strftime("%Y-%m-%d %H:%M:%S", time.localtime()) + ", " + "Compute duplicate rate done.")

ctgkmer_dic = {}

for key, value in asbHeaderKmer.items():

ctgkmer_dic[key] = {}

for key, value in asbHeaderKmer.items():

for k, v in value.items():

if k not in ctgkmer_dic[key].keys():

ctgkmer_dic[key][k] = 0 # ctgkmer_dic = {"ctg00001":{"ATCG":0,...,"ATCG":0},...}

chrkmer_dic = {}

for key, value in refHeaderKmer.items():

chrkmer_dic[key] = {}

for key, value in refHeaderKmer.items():

for k, v in value.items():

if k not in chrkmer_dic[key].keys():

chrkmer_dic[key][k] = 0 # chrkmer_dic = {"Chr01":{"ATCG":0,...,"ATCG":0},...}

chr_to_kmerlist = {}

contig_to_chr = {}

for ctg, ctgkmer in asbHeaderKmer.items():

chr_to_kmerlist = {}

for chr, chrkmer in refHeaderKmer.items():

chr_to_kmerlist[chr] = {}

contig_to_chr[ctg] = chr_to_kmerlist

for asb_key, asb_value in ctgkmer_dic.items():

for i in asb_value.keys():

for ref_key, ref_value in chrkmer_dic.items():

if i in ref_value.keys() and i not in contig_to_chr[asb_key][ref_key].keys():

contig_to_chr[asb_key][ref_key][i] = 0 # contig_to_chr={"ctg0001":{"chr01":{"ATCG":0,...,"ATCG":0},...},...}chr和ctg共有kmer

print("[INFO] " + time.strftime("%Y-%m-%d %H:%M:%S",time.localtime()) + ", " + "Get collective header kmer from reference and assemble file done.")

contig_to_kmer = {}

for key, value in contig_to_chr.items():

kmerlist = {}

for k, v in value.items():

for kmer, it in v.items():

kmerlist[kmer] = 0

contig_to_kmer[key] = kmerlist # contig_to_kmer = {"ctg0001":{"ATCG":0,...,"ATCG":0},...}

ctgkmer_dic = None

chrkmer_dic = None

proportion_of_the_largest_categories = 0

largest_categories_ex = {}

largest_categories_in = {}

numerator = 0

denominator = 0

for key, value in contig_to_chr.items():

largest_categories_num = 0

largest_categories_in = {}

for k, v in value.items():

if len(v) > largest_categories_num:

largest_categories_num = len(v)

for k, v in value.items():

if len(v) == largest_categories_num:

largest_categories_in[k] = v

largest_categories_ex[key] = largest_categories_in # largest_categories_ex={"ctg0001":{"chr01":{"ATCG":0,...,"ATCG":0}},...}

numerator += largest_categories_num

denominator += len(contig_to_kmer[key])

proportion_of_the_largest_categories += float(numerator) / float(denominator)

print("[INFO] " + time.strftime("%Y-%m-%d %H:%M:%S",time.localtime()) + ", " + "Compute proportion of the largest categories done.")

aveEachCtgDistance_sum = 0

contig_to_chr = None

with open("largest_categories.dic","w") as fi:

fi.write(str(largest_categories_ex))

fi.close()

with open("refKmer.dic","w") as fi:

fi.write(str(refHeaderKmer))

fi.close()

with open("asbKmer.dic","w") as fi:

fi.write(str(asbHeaderKmer))

fi.close()

contig_nums = 0

for key, value in largest_categories_ex.items(): # largest_categories_ex={"ctg0001":{"chr01":{"ATCG":0,...,"ATCG":0}},...}

ref_base_pos_dic = {}

asb_base_pos_dic = {}

t = 0

eachCtgDistance_sum = 0

for k, v in value.items():

if len(v) > 1:

contig_nums += 1

for i in range(len(v)):

ref_base_pos_dic[list(v.items())[i][0]] = refHeaderKmer[k][list(v.items())[i][0]] # ref_base_pos_dic={"ATCG":[(1,21),...,(31,51)]}

asb_base_pos_dic[list(v.items())[i][0]] = asbHeaderKmer[key][list(v.items())[i][0]]

ref_base_list = list(ref_base_pos_dic.items())

ref_base_list.sort(key=lambda x: x[1][0][0], reverse=False)

for i in range(len(ref_base_list) - 1):

refKmerDistance = abs(ref_base_list[i + 1][1][0][0] - ref_base_list[i][1][0][0])

asbKmerDistance = {}

for j in range(len(asb_base_pos_dic[ref_base_list[i][0]])):

for m in range(len(asb_base_pos_dic[ref_base_list[i + 1][0]])):

distance = abs(asb_base_pos_dic[ref_base_list[i][0]][j][0] - asb_base_pos_dic[ref_base_list[i + 1][0]][m][0])

asbKmerDistance[distance] = 0

for j in asbKmerDistance.keys():

eachCtgDistance_sum += abs(j - refKmerDistance)

t += 1

aveEachCtgDistance_sum += eachCtgDistance_sum / t

else:

continue

ave_distance_diff = aveEachCtgDistance_sum / contig_nums

print("[INFO] " + time.strftime("%Y-%m-%d %H:%M:%S",time.localtime()) + ", " + "Compute average distance difference done." + "\n")

print("{:<12.7f}Complete\n"

"{:<12.7f}Complete and single-copy\n"

"{:<12.7f}Complete and duplicated\n"

"{:<12.7f}Proportion of the largest categories\n"

"{:<12.7f}ave distance diff\n".format(singleCopy + duplicateRate, singleCopy, duplicateRate,proportion_of_the_largest_categories, ave_distance_diff))

with open("result.report", "w") as fi:

fi.write("{:<12.7f}Complete\n"

"{:<12.7f}Complete and single-copy\n"

"{:<12.7f}Complete and duplicated\n"

"{:<12.7f}Proportion of the largest categories\n"

"{:<12.7f}ave distance diff\n".format(singleCopy + duplicateRate, singleCopy, duplicateRate,proportion_of_the_largest_categories, ave_distance_diff))

fi.close()

if __name__ == "__main__":

opt = ArgParse()

path = os.getcwd()

asb_seq = opt.input

ref_seq = opt.reference

kmer_len = opt.kmer_length

prefix = opt.out_prefix

if opt.sample != "all":

sample_num = int(opt.sample)

else:

sample_num = opt.sample

asb_seq_path = os.path.join(path,asb_seq)

ref_seq_path = os.path.join(path,ref_seq)

assembleAssessment(ref_seq_path, asb_seq_path, kmer_len, sample_num, prefix)

**2. custom script (QV)**

import argparse

import time

import os

import math

import numpy as np

def ArgParse():

group = argparse.ArgumentParser(description='A python script for genome assessment of QV value.')

group.add_argument('-s', '--seq', help='raw reads file for genome assessment(fastq)', required=True)

group.add_argument('-a', '--asb', help='genome assembly file for genome assessment(fasta)', required=True)

group.add_argument('-k', '--kmer-length', type=int, help='the kmer length used in assessment, default=21.',default=21)

group.add_argument('-t', '--threats', type=int, help='the threats used to process kmer in Jellyfish, default=10.',default=10)

group.add_argument('-hs', '--harsh-size', type=str, help='estimated harsh size to store kmer, and this value must up to genome size, default=1G.',default="1G")

return group.parse_args()

def integrateReadLine(fa):

file_name = fa.split("/")[-1]

fi = open(fa, "r")

lines = fi.readlines()

fi.close()

fo = open(file_name.split(".")[0] + "_integrate.fasta", "w")

n = "1"

for line in lines:

if line[0] == ">":

if n == "1":

fo.write(line)

else:

fo.write("\n" + line)

else:

n = "larger than 1"

line = line.strip()

fo.write(line)

fo.close()

print("[INFO] " + time.strftime("%Y-%m-%d %H:%M:%S",

time.localtime()) + ", " + "Integrate read lines in " + fa + " file done.")

def getJellyfishKmer(seq_fq,asb_fa,kmer_length,harsh_size,threats):

os.system("jellyfish count -C -c 7 -m " + str(kmer_length) + " -s " + harsh_size + " -t " + str(threats) + " -o " + "seq_kmer" + str(kmer_length) + ".out " + seq_fq)

os.system("jellyfish dump -c -t seq_kmer" + str(kmer_length) + ".out > seq_kmer" + str(kmer_length) + ".freq")

print("[INFO] " + time.strftime("%Y-%m-%d %H:%M:%S", time.localtime()) + ", " + "kmer frequency counting in sequence has done!")

os.system("jellyfish count -C -c 7 -m " + str(kmer_length) + " -s " + harsh_size + " -t " + str(threats) + " -o " + "asb_kmer" + str(kmer_length) + ".out " + asb_fa)

os.system("jellyfish dump -c -t asb_kmer" + str(kmer_length) + ".out > asb_kmer" + str(kmer_length) + ".freq")

print("[INFO] " + time.strftime("%Y-%m-%d %H:%M:%S",time.localtime()) + ", " + "kmer frequency counting in assembly has done!")

def calcuQV(kmer_length):

seqkmer_dict = {}

with open("seq_kmer" + str(kmer_length) + ".freq","r") as fi:

lines = fi.readlines()

for line in lines:

kmer = line.strip().split()[0]

seqkmer_dict[kmer] = 0

fi.close()

asbkmer_dict = {}

with open("asb_kmer" + str(kmer_length) + ".freq","r") as fi:

lines = fi.readlines()

for line in lines:

kmer = line.strip().split()[0]

asbkmer_dict[kmer] = 0

fi.close()

sharekmer_dict = {}

for key in seqkmer_dict.keys():

if key in asbkmer_dict.keys():

sharekmer_dict[key] = 0

del seqkmer_dict

QV = -10 * np.log10(1 - math.pow(len(sharekmer_dict)/len(asbkmer_dict),1/kmer_length))

with open("QV.value","w") as fi:

fi.write("{:<12.3f}".format(QV))

fi.close()

print("[INFO] " + time.strftime("%Y-%m-%d %H:%M:%S",time.localtime()) + ", " + "the QV value is {:<12.3f}!".format(QV))

if __name__ == "__main__":

opt = ArgParse()

seq_fa = opt.seq

asb_fa = opt.asb

kmer_length = opt.kmer_length

harsh_size = opt.harsh_size

threats = opt.threats

path = os.getcwd()

raw_asb_fa_path = os.path.join(path, asb_fa)

integrateReadLine(raw_asb_fa_path)

seq_fa_path = os.path.join(path, seq_fa)

asb_fa_path = os.path.join(path,raw_asb_fa_path.split("/")[-1].split(".")[0] + "_integrate.fasta")

getJellyfishKmer(seq_fa_path,asb_fa_path,kmer_length,harsh_size,threats)

calcuQV(kmer_length)

**3. custom script (for assembly, include Hicanu, hifiasm, HiFlye, MECAT2, Miniasm, NextDenovo, Shasta, Peregrine, Verkko, LJA, rust-mdbg)**

HiCanu：

\time -v canu -p rice -d /home/jiangheling/Luohh/Assemble/Truedata/Rice/Hicanu genomeSize=392m useGrid=false merylThreads=30 hapThreads=30 cormhapThreads=30 obtovlThreads=30 utgovlThreads=30 corThreads=30 ovbThreads=30 ovsThreads=30 redThreads=30 oeaThreads=30 batThreads=30 cnsThreads=30 -pacbio-hifi ../../Data/rice.fastq

Hifiasm：

\time -v hifiasm -o rice -t 30 ../../Data/rice.fastq

Hiflye:

\time -v flye --pacbio-hifi ../../Data/rice.fastq -o /home/jiangheling/Luohh/Assemble/Truedata/Rice/Hiflye --genome-size 392m --threads=30

Miniasm:

\time -v minimap2 -t 30 -x ava-pb ../../Data/rice.fastq ../../Data/rice.fastq | gzip -1 > rice.paf.gz

\time -v miniasm -f ../../Data/rice.fastq rice.paf.gz > rice.gfa

\time -v awk '/^S/{print ">"$2"\n"$3}' rice.gfa > rice.fasta

NextDenovo:

nextDenovo run.cfg

run.cfg：

[General]

job_type = local

job_prefix = nextDenovo

task = all

rewrite = yes

deltmp = yes

parallel_jobs = 10

input_type = raw

read_type = hifi # clr, ont, hifi

input_fofn = input.fofn

workdir = 01_rundir

[correct_option]

read_cutoff = 1k

genome_size = 392m # estimated genome size

sort_options = -m 40g -t 30

minimap2_options_raw = -t 30

pa_correction = 3

correction_options = -p 15

[assemble_option]

minimap2_options_cns = -t 30

minimap2_options_map = -t 30

nextgraph_options = -a 1

MECAT2：

\time -v mecat.pl correct config_file.txt

\time -v mecat.pl trim config_file.txt

\time -v mecat.pl assemble config_file.txt

config_file.txt：

PROJECT=Rice

RAWREADS=/home/jiangheling/Luohh/Assemble/Truedata/Data/rice.fastq

GENOME_SIZE=392000000

THREADS=30

MIN_READ_LENGTH=2000

CNS_OVLP_OPTIONS="-kmer_size 13"

CNS_PCAN_OPTIONS="-p 100000 -k 100"

CNS_OPTIONS=""

CNS_OUTPUT_COVERAGE=30

TRIM_OVLP_OPTIONS="-skip_overhang"

TRIM_PM4_OPTIONS="-p 100000 -k 100"

TRIM_LCR_OPTIONS=""

TRIM_SR_OPTIONS=""

ASM_OVLP_OPTIONS=""

FSA_OL_FILTER_OPTIONS="--max_overhang=-1 --min_identity=-1"

FSA_ASSEMBLE_OPTIONS=""

CLEANUP=0

Peregrine：

\time -v /public/home/zhaoxianjia/software/peregrine-2021-0.4.13/target/release/pg_asm ricereads.lst rice 30

shasta：

\time -v shasta --config HiFi-Oct2021 --input ../../Assemble/Truedata/Data/rice.fastq --assemblyDirectory rice --command assemble --threads 30

Verkko：

\time -v verkko -d /home/jiangheling/Luohh/True/Verkko/Hap --hifi /home/jiangheling/Luohh/True/Data/rice.fastq.gz --threads 30 --sto-run 30 100 24 --mer-run 30 100 24 --ovb-run 30 100 24 --ovs-run 30 100 24 --red-run 30 100 24 --mbg-run 30 100 24 --utg-run 30 100 24 --spl-run 30 100 24 --ali-run 30 100 24 --pop-run 30 100 24 --utp-run 30 100 24 --lay-run 30 100 24 --sub-run 30 100 24 --par-run 30 100 24 --cns-run 30 100 24

rust-mdbg:

rust_mdbg="/path/to/rust-mdbg"

output_prefix="example"

input_fastq="/path/to/test.fastq"

${rust_mdbg} -k 21 --density 0.003 -l 14 --prefix ${output_prefix} --threads 30 ${input_fastq}

LJA:

lja="/path/to/lja"

input_fastq="/path/to/test.fastq"

output_dir="/path/to/output"

${lja} -t 30 --diploid --reads ${input_fastq} -o ${output_dir}
