# Supplementary material for: Comprehensive assessment of 11 de novo HiFi assemblers on complex eukaryotic genomes and metagenomes
Source: HighWire-hosted journal article supplement (doi:10.1101/gr.278232.123), 2024-02-01
Supplement: Supplemental_Tables_final.docx [file Supplemental_Tables_final.docx]

**Supplemental Table 1.** Assemblers for single molecule sequencing (SMS) data at the time of publication

| **Assemblers** | **Type of input reads*** | **Reference** | **Source** |
| --- | --- | --- | --- |
| HiCanu | CCS | (Nurk et al. 2020) | https://github.com/marbl/canu |
| Canu | CCS/CLR/ONT | (Koren et al. 2017) | https://github.com/marbl/canu |
| hifiasm | CCS | (Cheng et al. 2021) | https://github.com/chhylp123/hifiasm |
| miniasm | CCS/CLR/ONT | (Li 2016) | https://github.com/lh3/minimap2 |
| hifiasm-meta | CCS/CLR | (Feng et al. 2022) | https://github.com/xfengnefx/hifiasm-meta |
| HiFlye | CCS | (Kolmogorov et al. 2019) | https://github.com/fenderglass/Flye |
| metaFlye | CCS/CLR | (Kolmogorov et al. 2020) | https://github.com/fenderglass/Flye |
| Flye | CCS/CLR/ONT | (Kolmogorov et al. 2019) | https://github.com/fenderglass/Flye |
| ABruijn | CCS/CLR/ONT | (Lin et al. 2016) | https://github.com/fenderglass/Flye |
| MECAT2 | CCS/CLR | ( Xiao et al. 2017) | https://github.com/xiaochuanle/MECAT2 |
| NECAT | ONT | ( Chen et al. 2021) | https://github.com/xiaochuanle/NECAT |
| NextDenovo | CCS/CLR/ONT | -- | https://github.com/Nextomics/NextDenovo |
| wtdbg2 | CCS/CLR/ONT | (Ruan and Li 2020) | https://github.com/ruanjue/wtdbg2 |
| PBAssember | CCS/CLR | -- | https://github.com/PacificBiosciences/pb-assembly |
| FALCON | CCS/CLR | (Chin et al. 2016) | https://github.com/PacificBiosciences/FALCON/ |
| FALCON-unzip | CCS/CLR | – | https://github.com/PacificBiosciences/FALCON/ |
| Shasta | ONT/CCS | (Shafin et al. 2020) | https://github.com/chanzuckerberg/shasta |
| rust-mdbg | CCS | (Ekim et al. 2021) | https://github.com/ekimb/rust-mdbg/ |
| HERA | CCS/CLR/ONT | (Du and Liang 2019) | https://github.com/liangclab/HERA |
| Peregrine | CCS | (Mills et al. 2020) | https://github.com/cschin/Peregrine |
| HINGE | CCS/CLR/ONT/NGS | (Kamath et al. 2017) | https://github.com/HingeAssembler/HINGE |
| MARVEL | CCS/CLR/NGS/OM | (Nowoshilow et al. 2018) | https://github.com/schloi/MARVEL |
| Unicycler | CCS/CLR/ONT/NGS | (Wick et al. 2017) | https://github.com/rrwick/Unicycler |
| Verkko | CCS/ONT | (Rautiainen et al. 2023) | https://github.com/marbl/verkko/ |
| phasebook | CCS/CLR/ONT | (Luo et al. 2021) | https://github.com/phasebook/phasebook |
| LJA | CCS | (Bankevich et al. 2022) | https://github.com/AntonBankevich/LJA |

CCS = PacBio HiFi, CRL = PacBio, ONT=Oxford Nanopore, NGS=Illumina, OM=Optical map

**Supplemental Table 2.** Type of data sets used to assess the eleven assemblers evaluated in this study

|  | **HiCanu** | **hifiasm** | **HiFlye** | **Verkko** | **NextDenovo** | **MECAT2** | **miniasm** | **Peregrine** | **Shasta** | **hifiasm-meta** | **metaFlye** |
| --- | --- | --- | --- | --- | --- | --- | --- | --- | --- | --- | --- |
| **Tested on real data set of varying ploidies** | √ | √ | √ | √ | √ | √ | √ | √ | √ |  |  |
| **Tested on synthetic data set of varying ploidies** | √ | √ | √ | √ | √ | √ | √ | √ | √ |  |  |
| **Tested on datasets of varying coverage** | √ | √ | √ | √ |  |  |  |  |  |  |  |
| **Tested on datasets of varying heterozygosity** | √ | √ | √ | √ |  |  |  |  |  |  |  |
| **Tested on real metagenomic data sets** | √ |  |  |  |  |  |  |  |  | √ | √ |
| **Tested on synthetic metagenomic data set** | √ |  |  |  |  |  |  |  |  | √ | √ |

**Supplemental Table 3.** QUAST evaluation of the assemblers on the three synthetic read datasets generated from varying ploidy (number in bold black refer to assemblies that have a genome fraction higher than 99%; numbers in red bold indicate poor duplication ratio (>1.001), poor number of mismatches or indels per 100kb)

| **Assemblers** | **Dataset ploidy** | **# mis-assemblies** | **Mis-assembly  length (bp)** | **Genome fraction (%)** | **Duplication ratio** | **Mismatches per 100 kbp** | **Indels per 100 kbp** | **Longest alignment (bp)** | **Total aligned length (bp)** |
| --- | --- | --- | --- | --- | --- | --- | --- | --- | --- |
| **HiCanu** | haploid | 5 | 49,330,823 | **99.963** | 1.001 | 0.01 | 0.13 | 44,748,265 | 391,744,235 |
| diploid | 1 | 54,040,947 | **99.982** | **1.029** | 0.15 | 2.80 | 41,922,712 | 805,554,205 |
| tetraploid | 0 | 0 | **99.979** | 1.000 | 0.00 | 0.05 | 44,752,050 | 1,566,073,325 |
| **hifiasm** | haploid | 1 | 64,471,078 | **99.966** | 1.000 | 0.00 | 0.03 | 44,750,356 | 391,445,870 |
| diploid | 0 | 0 | **99.989** | 1.000 | 0.00 | 0.02 | 44,753,983 | 783,075,092 |
| tetraploid | 0 | 0 | **99.990** | **1.021** | 0.00 | 0.03 | 44,754,015 | 1,598,870,363 |
| **HiFlye** | haploid | 97 | 7,725,085 | 9.033 | **1.005** | **523.46** | **91.83** | 210,293 | 35,437,913 |
| diploid | 218 | 16,162,933 | 28.668 | **1.059** | **489.82** | **224.88** | 303,924 | 237,665,692 |
| tetraploid | 199 | 15,387,638 | 9.139 | **1.028** | **648.61** | **269.89** | 232,624 | 147,063,902 |
| **MECAT2** | haploid | 26 | 67,985,320 | **99.095** | 1.001 | 1.45 | 2.57 | 14,446,805 | 388,361,680 |
| diploid | 17 | 228,839,341 | 49.885 | **1.009** | **537.47** | **433.84** | 31,700,692 | 394,059,333 |
| tetraploid | 1 | 22,757 | 24.993 | **1.010** | **572.88** | **465.95** | 45,218,680 | 395,550,838 |
| **miniasm** | haploid | 80 | 56,593,856 | **99.548** | **1.044** | 17.17 | **177.31** | 8,094,655 | 406,804,375 |
| diploid | 56 | 56,984,108 | 50.786 | **1.022** | **607.38** | **406.99** | 8,386,962 | 406,347,885 |
| tetraploid | 66 | 98,990,084 | 25.370 | **1.010** | **1,009.52** | **575.09** | 11,640,935 | 401,489,577 |
| **NextDenovo** | haploid | 16 | 281,913,318 | **99.836** | 1.001 | 0.37 | 0.08 | 44,748,439 | 391,248,061 |
| diploid | 0 | 0 | 50.121 | **1.002** | **625.02** | **247.65** | 44,772,086 | 393,289,637 |
| tetraploid | 0 | 0 | 64.735 | **1.074** | **343.98** | **137.23** | 6,936,315 | 1,088,625,367 |
| **Shasta** | haploid | 29 | 187,931,833 | 97.310 | 1.000 | 0.22 | 0.55 | 12,045,295 | 380,965,966 |
| diploid | 0 | 0 | **99.914** | 1.000 | 0.01 | 0.09 | 38,557,004 | 782,475,256 |
| tetraploid | 0 | 0 | **99.884** | 1.000 | 0.01 | 0.15 | 37,218,585 | 1,564,440,621 |
| **Peregrine** | haploid | 3 | 51,575,558 | **99.950** | 1.000 | 0.02 | 0.02 | 44,749,911 | 391,369,064 |
| diploid | 0 | 0 | **99.975** | 1.000 | 0.00 | 0.02 | 44,751,819 | 782,943,685 |
| tetraploid | 0 | 0 | **99.979** | 1.000 | 0.00 | 0.02 | 44,752,051 | 1,565,942,170 |
| **Verkko** | haploid | 2 | 55,386 | **99.962** | 1.001 | 0.04 | 0.07 | 44,750,100 | 391,623,118 |
| diploid | 0 | 0 | **99.986** | 1.000 | 0.01 | 0.05 | 44,752,208 | 783,166,957 |
| tetraploid | 0 | 0 | **99.985** | 1.000 | 0.01 | 0.08 | 44,752,059 | 1,566,546,739 |

Varying ploidy: rice haploid form, rice diploid form, rice tetraploid form

**Supplemental Table 4.** QUAST evaluation of the assemblers on synthetic read datasets with varying coverage. (numbers in bold black refer to assemblies that have a genome fraction higher than 99%; numbers in red bold indicate poor duplication ratio (>1.001), poor number of mismatches or indels per 100 kb)

| **Assemblers** | **Coverage** | **# mis-assemblies** | **Mis-assemblies length (bp)** | **Genome fraction (%)** | **Duplication ratio** | **Mismatches per 100 kbp** | **Indels per 100 kbp** | **Longest alignment (bp)** | **Total aligned  length (bp)** | **N50 (bp)** | **NA50 (bp)** | **NGA50 (bp)** |
| --- | --- | --- | --- | --- | --- | --- | --- | --- | --- | --- | --- | --- |
| **HiCanu** | 10× | 12 | 4,139,516 | 96.490 | **1.008** | 1.27 | 6.41 | 1,567,174 | 762,011,582 | **362,820** | **361,674** | **354,062** |
| 20× | 6 | 82,014,294 | **99.978** | 1.001 | 0.02 | 0.19 | 39,633,843 | 783,836,474 | 30,836,250 | 28,779,395 | 28,779,395 |
| 30× | 9 | 222,894 | **99.986** | 1.001 | 0.02 | 0.16 | 44,751,843 | 783,752,235 | 30,832,328 | 30,822,074 | 30,822,074 |
| 50× | 7 | 66,771,961 | **99.989** | 1.001 | 0.01 | 0.13 | 44,754,199 | 783,785,969 | **32,119,694** | **30,831,937** | **30,831,937** |
| **hifiasm** | 10× | 2 | 25,574,172 | **99.358** | **1.007** | 1.54 | 1.73 | 18,932,345 | 783,063,788 | **6,169,309** | **6,105,493** | **6,105,493** |
| 20× | 2 | 90,976,315 | **99.981** | 1.000 | 0.00 | 0.04 | 44,753,700 | 783,069,644 | 32,623,532 | 32,116,602 | 32,116,602 |
| 30× | 1 | 69,354,047 | **99.982** | 1.000 | 0.00 | 0.03 | 44,751,856 | 783,112,607 | 32,621,441 | 32,119,326 | 32,119,326 |
| 50× | 0 | 0 | **99.981** | 1.000 | 0.00 | 0.01 | 44,751,525 | 783,061,588 | **32,120,257** | **32,120,257** | **32,120,257** |
| **HiFlye** | 10× | 36 | 2,092,119 | 1.207 | **1.003** | **890.72** | **156.23** | 135,016 | 9,448,596 | 57,559 | 53,351 | - |
| 20× | 115 | 9,272,306 | 8.412 | **1.022** | **405.10** | **72.43** | 206,248 | 67,188,620 | 76,021 | 72,272 | - |
| 30× | 147 | 14,978,985 | 21.004 | **1.038** | **222.65** | **40.48** | 384,211 | 170,494,136 | 100,007 | 97,163 | - |
| 50× | 134 | 17,290,478 | 53.443 | **1.080** | **109.39** | **23.28** | 1,311,461 | 451,709,080 | 163,476 | 161,262 | 58,886 |
| **Verkko** | 10× | 13 | 8,010,728 | **99.113** | **1.009** | 0.75 | 3.32 | 3,410,801 | 782,895,625 | **816,272** | **805,650** | **805,650** |
| 20× | 2 | 88,308 | **99.968** | 1.000 | 0.03 | 0.05 | 44,749,402 | 783,004,394 | 32,114,812 | 32,114,812 | 32,114,812 |
| 30× | 3 | 119,323 | **99.972** | 1.000 | 0.01 | 0.02 | 44,749,999 | 783,044,271 | 32,115,624 | 32,115,624 | 32,115,624 |
| 50× | 3 | 80,719 | **99.978** | 1.000 | 0.01 | 0.02 | 44,751,451 | 783,070,953 | **32,119,813** | **32,119,813** | **32,119,813** |

**Supplemental Table 5.** QUAST evaluation of the assemblers on synthetic read datasets with varying heterozygosity (number in bold black refer to assemblies that have a genome fraction higher than 99%; numbers in red bold indicate poor duplication ratio (>1.001), poor number of mismatches or indels per 100kb)

| **Assemblers** | **Heterozygosity (%)** | **# mis-assemblies** | **Mis-assemblies length (bp)** | **Genome fraction (%)** | **Duplication ratio** | **Mismatches per 100 kbp** | **Indels per 100 kbp** | **Longest alignment (bp)** | **Total aligned (bp)** |
| --- | --- | --- | --- | --- | --- | --- | --- | --- | --- |
| **HiCanu** | 0.5 | 6 | 82,014,294 | **99.978** | 1.001 | 0.02 | 0.19 | 39,633,843 | 783,836,474 |
| 1.0 | 4 | 114,615,133 | **99.970** | 1.000 | 0.02 | 0.08 | 44,752,312 | 783,203,265 |
| 1.5 | 2 | 40,274 | **99.973** | **1.027** | **0.14** | **2.70** | 39,633,948 | 804,150,637 |
| 2.5 | 3 | 30,230,813 | **99.972** | **1.027** | **0.19** | **2.70** | 44,748,851 | 804,010,879 |
| **hifiasm** | 0.5 | 2 | 90,976,315 | **99.981** | 1.000 | 0.00 | 0.04 | 44,753,700 | 783,069,644 |
| 1.0 | 1 | 68,068,567 | **99.983** | 1.001 | 0.01 | 0.05 | 44,752,654 | 783,375,608 |
| 1.5 | 4 | 168,079,021 | **99.983** | 1.000 | 0.01 | 0.05 | 44,752,513 | 783,245,742 |
| 2.5 | 1 | 68,069,667 | **99.980** | 1.000 | 0.00 | 0.04 | 44,751,537 | 783,222,364 |
| **HiFlye** | 0.5 | 115 | 9,272,306 | 8.412 | **1.022** | **405.10** | **72.43** | 206,248 | 67,188,620 |
| 1.0 | 113 | 8,791,644 | 8.117 | **1.016** | **487.33** | **95.72** | 211,069 | 64,440,403 |
| 1.5 | 218 | 16,134,273 | 28.471 | **1.058** | **331.27** | **79.10** | 322,985 | 235,707,637 |
| 2.5 | 237 | 16,146,388 | 29.198 | **1.064** | **459.64** | **115.86** | 264,413 | 243,095,346 |
| **Verkko** | 0.5 | 2 | 88,308 | **99.968** | 1.000 | 0.03 | 0.05 | 44,749,402 | 783,004,394 |
| 1.0 | 1 | 40,889 | **99.971** | 1.000 | 0.00 | 0.03 | 44,752,318 | 783,045,942 |
| 1.5 | 4 | 127,510 | **99.970** | 1.000 | 0.01 | 0.04 | 44,751,526 | 783,064,261 |
| 2.5 | 3 | 93,232 | **99.972** | 1.000 | 0.02 | 0.04 | 44,750,595 | 783,113,365 |

**Supplemental Table 6.** QUAST evaluation of the Hiflye on synthetic read datasets with varying read accuracies (number in bold black refer to assemblies that have a genome fraction higher than 99%; numbers in red bold indicate poor duplication ratio (>1.001), poor number of mismatches or indels per 100kb)

| **Read accuracy (%)** | **Dataset ploidy** | **Number of Contigs** | **Total length (bp)** | **# mis-assemblies** | **Mis-assemblies length (bp)** | **Genome fraction (%)** | **Duplication ratio** | **Mismatches per 100 kbp** | **Indels per 100 kbp** | **Total aligned (bp)** | **N50 (bp)** | **NA50 (bp)** | **NGA50 (bp)** |
| --- | --- | --- | --- | --- | --- | --- | --- | --- | --- | --- | --- | --- | --- |
| **99.4352** | haploid | 0 | 0 | 0 | 0 | 0 | 0 | 0 | 0 | 0 | 0 | 0 | - |
|  | diploid | 0 | 0 | 0 | 0 | 0 | 0 | 0 | 0 | 0 | 0 | 0 | - |
|  | tetraploid | 0 | 0 | 0 | 0 | 0 | 0 | 0 | 0 | 0 | 0 | 0 | - |
| **99.7305** | haploid | 2 | 72,869 | 0 | 0 | 0.018 | **1.003** | **397.45** | **118.12** | 72,143 | 46,362 | 45,636 | - |
|  | diploid | 4 | 14,5731 | 3 | 116,325 | 0.017 | **1.006** | **1,480.36** | **431.77** | 133,700 | 45,796 | 29,180 | - |
|  | tetraploid | 2 | 90,132 | 0 | 0 | 0.006 | 1.001 | **1,118.07** | **340.86** | 90,132 | 47,612 | 47,612 | - |
| **99.7567** | haploid | 2 | 79,859 | 1 | 55,109 | 0.020 | **1.002** | **1,663.27** | **347.55** | 76,656 | 55,109 | 24,750 | - |
|  | diploid | 1 | 35,626 | 1 | 35,626 | 0.004 | **1.072** | **159.41** | **267.69** | 35,613 | 35,626 | 33,305 | - |
|  | tetraploid | 1 | 41,910 | 1 | 41,910 | 0.002 | 0.995 | **2,753.52** | **565.92** | 32,717 | 41,910 | 8,964 | - |
| **99.7933** | haploid | 30 | 1,409,556 | 11 | 666,369 | 0.344 | 1.001 | **1,507.23** | **206.89** | 1,346,400 | 55,445 | 39,186 | - |
|  | diploid | 92 | 4,735,423 | 32 | 1,459,255 | 0.581 | 1.007 | **1,341.86** | **355.44** | 4,580,574 | 55,876 | 47,276 | - |
|  | tetraploid | 184 | 8,964,520 | 59 | 3,257,994 | 0.551 | 1.004 | **1,407.95** | **379.08** | 8,641,093 | 53,857 | 43,950 | - |
| **99.8155** | haploid | 1,336 | 65,865,587 | 147 | 7,811,983 | 16.583 | 1.012 | **367.64** | **66.31** | 65,569,007 | 53,945 | 51,953 | - |
|  | diploid | 2,619 | 127,561,562 | 200 | 10,242,197 | 15.618 | 1.041 | **593.38** | **256.98** | 127,228,950 | 52,918 | 51,816 | - |
|  | tetraploid | 5,227 | 256,238,919 | 280 | 14,514,899 | 15.504 | 1.053 | **560.41** | **247.6** | 255,470,457 | 53,187 | 51,887 | - |
| **99.8370** | haploid | 496 | 35,706,334 | 83 | 6,624,585 | 9.026 | 1.005 | **523.83** | **91.41** | 35,413,909 | 78,410 | 71,964 | - |
|  | diploid | 3,641 | 238,076,244 | 203 | 15,113,640 | 28.661 | 1.059 | **490.49** | **224.91** | 237,640,150 | 72,034 | 70,991 | - |
|  | tetraploid | 2,118 | 147,633,527 | 190 | 14,558,552 | 9.141 | 1.028 | **650.85** | **269.72** | 147,050,261 | 75,559 | 72,848 | - |
| **99.8474** | haploid | 2,771 | 235,921,515 | 152 | 16,757,869 | 59.387 | 1.014 | **67.23** | **13.84** | 235,663,436 | 99,880 | 97,468 | 55,747 |
|  | diploid | 8,409 | 542,319,259 | 215 | 14,445,880 | 60.510 | 1.144 | **349.94** | **166.85** | 541,969,465 | 74,518 | 73,903 | 54,034 |
|  | tetraploid | 17,235 | 1,129,884,458 | 137 | 8,589,543 | 60.761 | 1.187 | **421.43** | **199.95** | 1,129,709,933 | 72,786 | 72,694 | 57,535 |
| **99.9900** | haploid | 33 | 391,303,769 | 6 | 125,230,962 | **99.903** | 1.000 | 0.18 | 0.09 | 391,259,945 | **20,313,364** | 15,742,475 | 15,742,475 |
|  | diploid | **Out of memory** | | | | | | | | | | | |
|  | tetraploid | **Out of memory** | | | | | | | | | | | |

**Supplemental Table 7.** Result of metagenome assembly on the sheep gut metagenome dataset (numbers in bold represent the best performance)

|  | **HiCanu** | **metaFlye** | **hifiasm_meta** | **NextDenovo** |
| --- | --- | --- | --- | --- |
| **Total length (bp)** | 2,925,973,527 | 3,734,251,458 | **6,662,360,606** | 1,531,233,033 |
| **# Contigs** | 42,623 | 63,838 | **108,119** | 6,678 |
| **# Contigs (> 1 mbp)** | 434 | 505 | **945** | 373 |
| **# Circular contigs (> 1 mbp)** | 118 | 57 | **298** | N/A |
| **Maximum contig length (bp)** | 5,259,804 | 5,546,665 | 5,591,869 | **7,505,861** |
| **N50 (bp)** | 145,769 | 156,246 | 142,126 | **978,212** |
| **L50** | 2,335 | 2,604 | 5,302 | **384** |
| **# 16s rRNA** | 3,190 | 3,667 | **7,221** | 1,730 |
| **# 16s rRNA cluster** | 598 | 892 | **1,166** | 449 |

#16s rRNA is the number of identified 16s rRNA detected with Barrnap

#16s rRNA cluster is the number of 16s rRNA clusters identified by “VSEARCH” with 97% identity

bold numbers indicate the best statistics in each row

**Supplemental Table 8.** MetaQUAST assembly assessment on synthetic dataset (numbers in bold represent the best performance)

|  | **HiCanu** | **hifiasm-meta** | **metaFlye** | **NextDenovo** |
| --- | --- | --- | --- | --- |
| **Total length (bp)** | 443,543,723 | **719,720,092** | 410,892,380 | 183,607,019 |
| **Length of longest contig (bp)** | 7,173,072 | 7,209,818 | **7,223,378** | 5,886,657 |
| **# Contigs** | 3,693 | **8,146** | 2,477 | 488 |
| **# Mis-assemblies** | **172** | 439 | 1,530 | 663 |
| **# Mis-assembled contigs** | **159** | 366 | 562 | 250 |
| **Genome fraction** | 44.265% | **61.92%** | 52.45% | 34.175% |
| **# Mismatches per 100 kbp (bp)** | 2717.93 | **1960.17** | 4477.77 | 6951.69 |
| **# Indels per 100 kbp (bp)** | **209.48** | 213.81 | 338.4 | 446.34 |

**Supplemental Table 9.** hifiasm-meta and metaFlye performance on phylum, class, family and genus level

| **Classified level** | **Phylum** | | **Class** | | **Family** | | **Genus*** | |
| --- | --- | --- | --- | --- | --- | --- | --- | --- |
| **Assembler** | **hifiasm-meta** | **metaFlye** | **hifiasm-meta** | **metaFlye** | **hifiasm-meta** | **metaFlye** | **hifiasm-meta** | **metaFlye** |
| **Total length of genomes (bp)** | 851,776,028 | | 802,422,947 | | 992,325,362 | | 1,030,944,885 | |
| **Total length of assembly (bp)** | 1,034,104,664 | 557,130,864 | 847,574,639 | 543,494,648 | 1,002,288,733 | 296,854,298 | 839,810,301 | 102,163,398 |
| **Length of longest contig (bp)** | 9,025,608 | 11,602,271 | 9,368,970 | 9,263,541 | 5,907,390 | 5,474,693 | 5434436 | 1,025,462 |
| **# Contigs** | 19,497 | 1702 | 13,096 | 1123 | 17,899 | 3774 | 17,674 | 3172 |
| **# Mis-assemblies** | 203 | 421 | 224 | 291 | 306 | 1037 | N/A | 903 |
| **# Misassembled contigs** | 185 | 251 | 203 | 220 | 251 | 544 | N/A | 585 |
| **Misassembled contig rate (%)** | 0.009488639 | 0.147473561 | 0.015500916 | 0.195903829 | 0.01402313 | 0.144144144 | N/A | 0.18442623 |
| **Total length of misassembled contigs (bp)** | 443,889,836 | 391,121,910 | 450,232,657 | 372,019,660 | 375,945,067 | 177,585,207 | N/A | 40,144,595 |
| **Genome fraction (%)** | 121.41% | 65.41% | 105.63% | 67.73% | 101.00% | 29.92% | 81.46% | 9.91% |
| **Duplication rate (%)** | 5.997 | 1.116 | 5.809 | 1.14 | 7.061 | 2.088 | N/A | 4.929 |
| **#Mismatches per 100 kbp** | 534.15 | 617.66 | 1205.87 | 832.76 | 7453.66 | 10720.63 | N/A | 105955.19 |
| **#Indels per 100 kbp** | 106.52 | 90.88 | 138.1 | 65.82 | 364.99 | 541.82 | N/A | 4119.5 |

* At the genus level, MetaQUAST was not able to generate evaluation results for hifiasm-meta assembly, leading to N/A in the table.

**Supplemental Table 10.** Real datasets used in this study (for different choices of ploidy)

| **Species** | **NCBI SRR IDs** | **NCBI project IDs** | **Ref.** | **No. of reads** | **Read length N50** | **Read length N90** | **No. of bases** | **Estimated coverage depth** |
| --- | --- | --- | --- | --- | --- | --- | --- | --- |
| ***Oryza sativa* (rice)** | SRR13280199 | PRJNA686812 | (24) | 468,470 | 20,162 | 13,093 | 8,955,035,682 | 23× |
| ***Solanum tuberosum* (potato)** | SRR11318516 | PRJNA573826 | (25) | 2,322,217 | 13,199 | 11,712 | 30,916,784,187 | 36× |
| ***Syzygium samarangense* (wax apple)** | SRR23279229 | PRJNA928838 | - | 3,183,124 | 20,235 | 13,992 | 62,109,565,441 | 39× |

**Supplemental Table 11.** Synthetic datasets used in this study (for different choices of ploidy)

| **Ploidy** | **No. of reads** | **Read length mean (SD) (bp)** | **Read accuracy mean (SD)** | **Read N50 (bp)** | **Read N90 (bp)** | **No. of bases (bp)** | **Estimated coverage depth** |
| --- | --- | --- | --- | --- | --- | --- | --- |
| **Haploid** | 562,312 | 13,937.77 (2907.96) | 0.9981 (0.0024) | 14,243 | 11,002 | 7,831,258,362 | 20× |
| **Diploid** | 1,123,772 | 13,937.77 (2907.96) | 0.9981 (0.0024) | 14,266 | 11,007 | 15,662,752,640 | 20× |
| **Tetraploid** | 2,243,321 | 13,937.77 (2907.96) | 0.9981 (0.0024) | 14,295 | 11,021 | 31,325,370,155 | 20× |

**Supplemental Table 12.** Synthetic datasets used in this study for different choices of heterozygosity rate

| **Heterozygosity (%)** | **No. of reads** | **Read length mean (SD)** | **Read accuracy mean (SD)** | **Read N50 (bp)** | **Read N90 (bp)** | **Total length (bp)** |
| --- | --- | --- | --- | --- | --- | --- |
| **0.5** | 756,203 | 18029.17 (2988.28) | 0.998 (0.002059) | 20,535 | 18,124 | 15,662,501,103 |
| **1.0** | 756,370 | 18029.17 (2988.28) | 0.998 (0.002059) | 20,530 | 18,119 | 15,662,453,065 |
| **1.5** | 868,322 | 18029.17 (2988.28) | 0.998 (0.002059) | 17,797 | 15,062 | 15,662,521,012 |
| **2.5** | 868,435 | 18029.17 (2988.28) | 0.998 (0.002059) | 17,791 | 15,065 | 15,662,490,262 |

**Supplemental Table 13.** Synthetic datasets used in this study for different choices of the sequencing coverage

| **Coverage** | **Number of reads** | **Read length mean (SD)** | **Read accuracy mean (SD)** | **Read length N50 (bp)** | **Read length N90 (bp)** | **Total length (bp)** |
| --- | --- | --- | --- | --- | --- | --- |
| **10×** | 379,547 | 18029.17 (2988.28) | 0.998 (0.002059) | 20,489 | 18,035 | 7,831,250,54 |
| **20×** | 756,203 | 18029.17 (2988.28) | 0.998 (0.002059) | 20,535 | 18,124 | 15,662,501,103 |
| **30×** | 1,134,082 | 18029.17 (2988.28) | 0.998 (0.002059) | 20,538 | 18,122 | 23,493,746,640 |
| **50×** | 1,890,437 | 18029.17 (2988.28) | 0.998 (0.002059) | 20,535 | 18,120 | 39,156,245,378 |

**Supplemental Table 14.** Real HiFi datasets for learning sequencing error models to generate synthetic datasets with different error-rates

| **Read accuracy mean (%)** | **Species** | **NCBI SRR ID** | **Number of reads** | **Total length (bp)** | **Read length N50 (bp)** | **Longest read (bp)** |
| --- | --- | --- | --- | --- | --- | --- |
| **99.4352** | *Solanum tuberosum* | SRR11318516 | 2,322,217 | 30,916,784,187 | 13,199 | 22,456 |
| **99.7305** | *Syzygium samarangense* | SRR23279229 | 3,183,124 | 62,109,565,441 | 20,235 | 58,779 |
| **99.7567** | *Oryza sativa (MH63)* | SRR10238608 | 1,183,736 | 25,269,624,125 | 21,180 | 49,925 |
| **99.7933** | *Homo sapiens (S1)* | SRR18158592 | 5,123,038 | 97,087,838,967 | 19,091 | 57,671 |
| **99.8155** | *Zea mays L* | SRR11606869 | 3,089,410 | 48,074,871,022 | 15,633 | 46,036 |
| **99.8370** | *Homo sapiens (S2)* | SRR11292120 | 5,567,158 | 100,369,168,661 | 17,781 | 50,003 |
| **99.8474** | *Mus musculus* | SRR11606870 | 4,060,680 | 66,492,918,714 | 16,371 | 44,195 |
| **99.9900** | *Oryza sativa (ZS97)* | SRR13280199 | 468,470 | 8,955,035,682 | 20,162 | 50,185 |

**Supplemental Table 15.** Synthetic datasets for different choices of the sequencing error rate (i.e., 100 - read accuracy)

| **Read accuracy (%)** | **Error model** | **Ploidy** | **Genome size (bp)** | **Number  of chromosomes** | **Number of reads** | **Total length (bp)** | **Coverage** |
| --- | --- | --- | --- | --- | --- | --- | --- |
| **99.8370** | SRR11292120  *Homo sapiens* | Haplotype | 397,156,254 | 12 | 379,469 | 7,831,275,908 | 20× |
| Diplod | 783,135,233 | 24 | 868,064 | 15,662,822,297 |
| Polyploid | 1,566,265,297 | 48 | 1,520,689 | 31,325,566,999 |
| **99.4352** | SRR11318516  *Solanum tuberosum* | Haplotype | 397,156,254 | 12 | 588,191 | 7,831,233,459 | 20× |
| Diplod | 783,135,233 | 24 | 1,176,381 | 15,662,702,427 |
| Polyploid | 1,566,265,297 | 48 | 2,352,715 | 31,325,298,566 |
| **99.7305** | SRR23279229  *Syzygium samarangense* | Haplotype | 397,156,254 | 12 | 400,589 | 7,831,232,600 | 20× |
| Diplod | 783,135,233 | 24 | 801,372 | 15,662,700,916 |
| Polyploid | 1,566,265,297 | 48 | 1,603,998 | 31,325,299,850 |
| **99.7567** | SRR10238608  *Oryza sativa-MH63* | Haplotype | 397,156,254 | 12 | 366,898 | 7,831,232,600 | 20× |
| Diplod | 783,135,233 | 24 | 733,581 | 15,662,700,976 |
| Polyploid | 1,566,265,297 | 48 | 1,466,799 | 31,325,299,738 |
| **99.7933** | SRR18158592  *Homo sapiens* | Haplotype | 397,156,254 | 12 | 413,955 | 7,831,232,600 | 20× |
| Diplod | 783,135,233 | 24 | 827,983 | 15,662,701,390 |
| Polyploid | 1,566,265,297 | 48 | 1,652,450 | 31,325,299,003 |
| **99.8155** | SRR11606869  *Zea mays L* | Haplotype | 397,156,254 | 12 | 502,716 | 7,831,233,282 | 20× |
| Diplod | 783,135,233 | 24 | 1,006,371 | 15,662,701,548 |
| Polyploid | 1,566,265,297 | 48 | 2,006,906 | 313,25,299,742 |
| **99.8474** | SRR11606870  *Mus musculus* | Haplotype | 397,156,254 | 12 | 478,569 | 7,831,233,227 | 20× |
| Diplod | 783,135,233 | 24 | 956,717 | 15,662,702,580 |
| Polyploid | 1,566,265,297 | 48 | 1,914,952 | 31,325,299,511 |
| **99.9900** | SRR13280199  *Oryza sativa-ZS97* | Haplotype | 397,156,254 | 12 | 409,973 | 7,831,232,600 | 20× |
| Diplod | 783,135,233 | 24 | 819,042 | 15,662,701,981 |
| Polyploid | 1,566,265,297 | 48 | 1,638,119 | 31,325,298,904 |

**Supplemental Table 16.** Real HiFi reads for sheep gut microbiome

| **Species** | **NCBI SRR IDs** | **NCBI Project IDs** | **Ref.** | **#Reads** | **Read N50 (bp)** | **Read N90 (bp)** | **Total length (bp)** |
| --- | --- | --- | --- | --- | --- | --- | --- |
| ***Sheep gut microbiome*** | SRX10647529  SRX7628648 | PRJNA595610 | (26) | 22,118,393 | 12,312 | 8,642 | 255Gbp |

**Supplemental Table 17.** Synthetic dataset for metagenome assessment

| **Characters** | **Genomes selected from GTDB** | | **#Reads** | **Read mean length (bp)** | **Read mean accuracy** | **N50 (bp)** | **N90 (bp)** | **Total length (bp)** |
| --- | --- | --- | --- | --- | --- | --- | --- | --- |
| **Completeness, Contamination, #Contig** | **#Genomes** |
| High-fidelity to real metagenome data | >99%, <1%, <3 | 382 | 844,146 | 16,803.1 | 0.998 | 17,469 | 11,832 | 14,184,266,287 |

**Supplemental Table 18.** Mash distance of references in simulation datasets

| **Level** | **Min_dist** | **Max_dist** | **Mean_dist** | **#Redundant genomes** | **Reference count** | **#Cluster count (dist=0.01)** |
| --- | --- | --- | --- | --- | --- | --- |
| Synthetic | 0.0 | 1.0 | 0.951 | 22 | 328 | 307 |
| Phylum | 0.0 | 1.0 | 0.754205 | 2 | 200 | 139 |
| Class | 0.0 | 1.0 | 0.745807 | 8 | 200 | 131 |
| Family | 0.0 | 1.0 | 0.302885 | 5 | 200 | 108 |
| Genus | 0.0 | 1.0 | 0.190041 | 25 | 200 | 55 |

**Supplementary Table 19.** Simulated datasets at the phylum, class, family and genus levels

| **Characters** | **GTDB** | | **#Reads** | **Read mean length (bp)** | **Read accuracy mean** | **N50 (bp)** | **N90 (bp)** | **Total length (bp)** |
| --- | --- | --- | --- | --- | --- | --- | --- | --- |
| **Completeness, Contamination, #Contig** | **#Genomes** |
| **Phylum level** | >99%, <1%, <3 | 200 | 2,284,590 | 16,907.9 | 0.998 | 17,583 | 11,884 | 38,627,621,930 |
| **Class level** | 200 | 1,835,183 | 16,824.4 | 0.998 | 17,466 | 11,845 | 30,875,774,723 |
| **Family level** | 200 | 2,177,691 | 16,866.9 | 0.998 | 17,522 | 11,865 | 36,730,824,411 |
| **Genus level** | 200 | 2,023,373 | 16,910.5 | 0.998 | 17,581 | 11,884 | 34,216,272,006 |

**Supplementary Table 20.** Complete list of all the synthetic datasets used in this study

| **Category** | **Dataset** | **URL** |
| --- | --- | --- |
| varying coverage | reference | http://ftp.agis.org.cn:8888/~panweihua/benchmark/assembly_software_benchmark/eukaryotic_genomes/varying_coverage/ref_heter0.5.fasta.gz |
|  | 10× reads | http://ftp.agis.org.cn:8888/~panweihua/benchmark/assembly_software_benchmark/eukaryotic_genomes/varying_coverage/simdiphet0.5_10x.fastq.gz |
|  | 20× reads | http://ftp.agis.org.cn:8888/~panweihua/benchmark/assembly_software_benchmark/eukaryotic_genomes/varying_coverage/simdiphet0.5_20x.fastq.gz |
|  | 30× reads | http://ftp.agis.org.cn:8888/~panweihua/benchmark/assembly_software_benchmark/eukaryotic_genomes/varying_coverage/simdiphet0.5_30x.fastq.gz |
|  | 50× reads | http://ftp.agis.org.cn:8888/~panweihua/benchmark/assembly_software_benchmark/eukaryotic_genomes/varying_coverage/simdiphet0.5_50x.fastq.gz |
| varying heterozygous | heter 0.5 reference | http://ftp.agis.org.cn:8888/~panweihua/benchmark/assembly_software_benchmark/eukaryotic_genomes/varying_heterozygous/ref_heter0.5.fasta.gz |
|  | heter 0.5 reads | http://ftp.agis.org.cn:8888/~panweihua/benchmark/assembly_software_benchmark/eukaryotic_genomes/varying_heterozygous/simdiphet0.5_20x.fastq.gz |
|  | heter 1.0 reference | http://ftp.agis.org.cn:8888/~panweihua/benchmark/assembly_software_benchmark/eukaryotic_genomes/varying_heterozygous/ref_heter1.fasta.gz |
|  | heter 1.0 reads | http://ftp.agis.org.cn:8888/~panweihua/benchmark/assembly_software_benchmark/eukaryotic_genomes/varying_heterozygous/simdiphet1_20x.fastq.gz |
|  | heter 1.5 reference | http://ftp.agis.org.cn:8888/~panweihua/benchmark/assembly_software_benchmark/eukaryotic_genomes/varying_heterozygous/ref_heter1.5.fasta.gz |
|  | heter 1.5 reads | http://ftp.agis.org.cn:8888/~panweihua/benchmark/assembly_software_benchmark/eukaryotic_genomes/varying_heterozygous/simdiphet1.5_20x.fastq.gz |
|  | heter 2.5 reference | http://ftp.agis.org.cn:8888/~panweihua/benchmark/assembly_software_benchmark/eukaryotic_genomes/varying_heterozygous/ref_heter2.5.fasta.gz |
|  | heter 2.5 reads | http://ftp.agis.org.cn:8888/~panweihua/benchmark/assembly_software_benchmark/eukaryotic_genomes/varying_heterozygous/simdiphet2.5_20x.fastq.gz |
| varying ploidy | haploid reference | http://ftp.agis.org.cn:8888/~panweihua/benchmark/assembly_software_benchmark/eukaryotic_genomes/varying_ploidy/haploid_ref.fasta.gz |
|  | haploid reads | http://ftp.agis.org.cn:8888/~panweihua/benchmark/assembly_software_benchmark/eukaryotic_genomes/varying_ploidy/simHaploid.fastq.gz |
|  | diploid reference | http://ftp.agis.org.cn:8888/~panweihua/benchmark/assembly_software_benchmark/eukaryotic_genomes/varying_ploidy/diploid_ref.fasta.gz |
|  | diploid reads | http://ftp.agis.org.cn:8888/~panweihua/benchmark/assembly_software_benchmark/eukaryotic_genomes/varying_ploidy/simDiploid.fastq.gz |
|  | tetraploid reference | http://ftp.agis.org.cn:8888/~panweihua/benchmark/assembly_software_benchmark/eukaryotic_genomes/varying_ploidy/tetraploid_ref.fasta.gz |
|  | tetraploid reads | http://ftp.agis.org.cn:8888/~panweihua/benchmark/assembly_software_benchmark/eukaryotic_genomes/varying_ploidy/simTetraploid.fastq.gz |
| varying precision rate | haploid reference | http://ftp.agis.org.cn:8888/~panweihua/benchmark/assembly_software_benchmark/eukaryotic_genomes/varying_precious_rate/haploid_ref.fasta.gz |
|  | haploid reads (99.4352%) | http://ftp.agis.org.cn:8888/~panweihua/benchmark/assembly_software_benchmark/eukaryotic_genomes/varying_precious_rate/simhap.potato.fastq.gz |
|  | haploid reads (99.7305%) | http://ftp.agis.org.cn:8888/~panweihua/benchmark/assembly_software_benchmark/eukaryotic_genomes/varying_precious_rate/simhap.wax_apple.fastq.gz |
|  | haploid reads (99.7567%) | http://ftp.agis.org.cn:8888/~panweihua/benchmark/assembly_software_benchmark/eukaryotic_genomes/varying_precious_rate/simhap.rice_mh63.fastq.gz |
|  | haploid reads (99.7933%) | http://ftp.agis.org.cn:8888/~panweihua/benchmark/assembly_software_benchmark/eukaryotic_genomes/varying_precious_rate/simhap.human2.fastq.gz |
|  | haploid reads (99.8155%) | http://ftp.agis.org.cn:8888/~panweihua/benchmark/assembly_software_benchmark/eukaryotic_genomes/varying_precious_rate/simhap.zea_mays.fastq.gz |
|  | haploid reads (99.837%) | http://ftp.agis.org.cn:8888/~panweihua/benchmark/assembly_software_benchmark/eukaryotic_genomes/varying_precious_rate/simhap.human1.fastq.gz |
|  | haploid reads (99.8474%) | http://ftp.agis.org.cn:8888/~panweihua/benchmark/assembly_software_benchmark/eukaryotic_genomes/varying_precious_rate/simhap.mus_musculus.fastq.gz |
|  | haploid reads (99.99%) | http://ftp.agis.org.cn:8888/~panweihua/benchmark/assembly_software_benchmark/eukaryotic_genomes/varying_precious_rate/simhap.rice_zs97.fastq.gz |
|  | diploid reference | http://ftp.agis.org.cn:8888/~panweihua/benchmark/assembly_software_benchmark/eukaryotic_genomes/varying_precious_rate/diploid_ref.fasta.gz |
|  | diploid reads (99.4352%) | http://ftp.agis.org.cn:8888/~panweihua/benchmark/assembly_software_benchmark/eukaryotic_genomes/varying_precious_rate/simdip.potato.fastq.gz |
|  | diploid reads (99.7305%) | http://ftp.agis.org.cn:8888/~panweihua/benchmark/assembly_software_benchmark/eukaryotic_genomes/varying_precious_rate/simdip.wax_apple.fastq.gz |
|  | diploid reads (99.7567%) | http://ftp.agis.org.cn:8888/~panweihua/benchmark/assembly_software_benchmark/eukaryotic_genomes/varying_precious_rate/simdip.rice_mh63.fastq.gz |
|  | diploid reads (99.7933%) | http://ftp.agis.org.cn:8888/~panweihua/benchmark/assembly_software_benchmark/eukaryotic_genomes/varying_precious_rate/simdip.human2.fastq.gz |
|  | diploid reads (99.8155%) | http://ftp.agis.org.cn:8888/~panweihua/benchmark/assembly_software_benchmark/eukaryotic_genomes/varying_precious_rate/simdip.zea_mays.fastq.gz |
|  | diploid reads (99.837%) | http://ftp.agis.org.cn:8888/~panweihua/benchmark/assembly_software_benchmark/eukaryotic_genomes/varying_precious_rate/simdip.human1.fastq.gz |
|  | diploid reads (99.8474%) | http://ftp.agis.org.cn:8888/~panweihua/benchmark/assembly_software_benchmark/eukaryotic_genomes/varying_precious_rate/simdip.mus_musculus.fastq.gz |
|  | diploid reads (99.99%) | http://ftp.agis.org.cn:8888/~panweihua/benchmark/assembly_software_benchmark/eukaryotic_genomes/varying_precious_rate/simdip.rice_zs97.fastq.gz |
|  | tetraploid reference | http://ftp.agis.org.cn:8888/~panweihua/benchmark/assembly_software_benchmark/eukaryotic_genomes/varying_precious_rate/tetraploid_ref.fasta.gz |
|  | tetraploid reads (99.4352%) | http://ftp.agis.org.cn:8888/~panweihua/benchmark/assembly_software_benchmark/eukaryotic_genomes/varying_precious_rate/simtetra.potato.fastq.gz |
|  | tetraploid reads (99.7305%) | http://ftp.agis.org.cn:8888/~panweihua/benchmark/assembly_software_benchmark/eukaryotic_genomes/varying_precious_rate/simtetra.wax_apple.fastq.gz |
|  | tetraploid reads (99.7567%) | http://ftp.agis.org.cn:8888/~panweihua/benchmark/assembly_software_benchmark/eukaryotic_genomes/varying_precious_rate/simtetra.rice_mh63.fastq.gz |
|  | tetraploid reads (99.7933%) | http://ftp.agis.org.cn:8888/~panweihua/benchmark/assembly_software_benchmark/eukaryotic_genomes/varying_precious_rate/simtetra.human2.fastq.gz |
|  | tetraploid reads (99.8155%) | http://ftp.agis.org.cn:8888/~panweihua/benchmark/assembly_software_benchmark/eukaryotic_genomes/varying_precious_rate/simtetra.zea_mays.fastq.gz |
|  | tetraploid reads (99.837%) | http://ftp.agis.org.cn:8888/~panweihua/benchmark/assembly_software_benchmark/eukaryotic_genomes/varying_precious_rate/simtetra.human1.fastq.gz |
|  | tetraploid reads (99.8474%) | http://ftp.agis.org.cn:8888/~panweihua/benchmark/assembly_software_benchmark/eukaryotic_genomes/varying_precious_rate/simtetra.mus_musculus.fastq.gz |
|  | tetraploid reads (99.99%) | http://ftp.agis.org.cn:8888/~panweihua/benchmark/assembly_software_benchmark/eukaryotic_genomes/varying_precious_rate/simtetra.rice_zs97.fastq.gz |
| diploid human genome | reference | http://ftp.agis.org.cn:8888/~panweihua/benchmark/assembly_software_benchmark/eukaryotic_genomes/human_diploid/ chm1-chm13.reference.fasta.gz |
|  | reads | http://ftp.agis.org.cn:8888/~panweihua/benchmark/assembly_software_benchmark/eukaryotic_genomes/human_diploid/ CHM1-CHM13.fastq.gz |
| metagenome | synthetic meta simulating real distribution reads | http://ftp.agis.org.cn:8888/~panweihua/benchmark/assembly_software_benchmark/metagenomes/synthetic_meta_simulating_real_distribution/synthetic_metagenomic_data.fastq.gz |
|  | class level reads | http://ftp.agis.org.cn:8888/~panweihua/benchmark/assembly_software_benchmark/metagenomes/taxonomic_levels/class_level_sim.fastq.gz |
|  | family level reads | http://ftp.agis.org.cn:8888/~panweihua/benchmark/assembly_software_benchmark/metagenomes/taxonomic_levels/family_level_sim.fastq.gz |
|  | genus level reads | http://ftp.agis.org.cn:8888/~panweihua/benchmark/assembly_software_benchmark/metagenomes/taxonomic_levels/genus_level_sim.fastq.gz |
|  | phylum level reads | http://ftp.agis.org.cn:8888/~panweihua/benchmark/assembly_software_benchmark/metagenomes/taxonomic_levels/phylum_level_sim.fastq.gz |

**Supplementary Table 21.** Assemblers version and command line parameters

| **Assemblers** | **Version** | **Command** |
| --- | --- | --- |
| HiCanu | 2.2 | canu -p rice -d /home/jiangheling/Luohh/Assemble/Truedata/Rice/Hicanu genomeSize=392m useGrid=false merylThreads=30 hapThreads=30 cormhapThreads=30 obtovlThreads=30 utgovlThreads=30 corThreads=30 ovbThreads=30 ovsThreads=30 redThreads=30 oeaThreads=30 batThreads=30 cnsThreads=30 -pacbio-hifi ../../Data/rice.fastq |
| hifiasm | 0.16.1-r375 | hifiasm -o rice -t 30 ../../Data/rice.fastq |
| HiFlye | 2.9-b1768 | flye --pacbio-hifi ../../Data/rice.fastq -o /home/jiangheling/Luohh/Assemble/Truedata/Rice/Hiflye --genome-size 392m --threads=30 |
| MECAT2 | -- | mecat.pl correct config_file.txt  mecat.pl trim config_file.txt  mecat.pl assemble config_file.txt  config_file.txt configure file：  PROJECT=Rice  RAWREADS=/home/jiangheling/Luohh/Assemble/Truedata/Data/rice.fastq  GENOME_SIZE=392000000  THREADS=30  MIN_READ_LENGTH=2000  CNS_OVLP_OPTIONS="-kmer_size 13"  CNS_PCAN_OPTIONS="-p 100000 -k 100"  CNS_OPTIONS=""  CNS_OUTPUT_COVERAGE=30  TRIM_OVLP_OPTIONS="-skip_overhang"  TRIM_PM4_OPTIONS="-p 100000 -k 100"  TRIM_LCR_OPTIONS=""  TRIM_SR_OPTIONS=""  ASM_OVLP_OPTIONS=""  FSA_OL_FILTER_OPTIONS="--max_overhang=-1 --min_identity=-1"  FSA_ASSEMBLE_OPTIONS=""  CLEANUP=0 |
| Miniasm | 2.23-r1111 & 0.3-r179 | minimap2 -t 30 -x ava-pb ../../Data/rice.fastq ../../Data/rice.fastq | gzip -1 > rice.paf.gz  miniasm -f ../../Data/rice.fastq rice.paf.gz > rice.gfa  awk '/^S/{print ">"$2"\n"$3}' rice.gfa > rice.fasta |
| NextDenovo | 2.5.0 | nextDenovo run.cfg  run.cfg configure file：  [General]  job_type = local  job_prefix = nextDenovo  task = all  rewrite = yes  deltmp = yes  parallel_jobs = 10  input_type = raw  read_type = hifi  input_fofn = input.fofn  workdir = 01_rundir  [correct_option]  read_cutoff = 1k  genome_size = 392m  sort_options = -m 40g -t 30  minimap2_options_raw = -t 30  pa_correction = 3  correction_options = -p 15  [assemble_option]  minimap2_options_cns = -t 30  minimap2_options_map = -t 30  nextgraph_options = -a 1 |
| Shasta | 0.10.0 | shasta --config HiFi-Oct2021 --input ../../Assemble/Truedata/Data/rice.fastq --assemblyDirectory rice --command assemble --threads 30 |
| Peregrine | 0.4.13 | /public/home/zhaoxianjia/software/peregrine-2021-0.4.13/target/release/pg_asm ricereads.lst rice 30 |
| Verkko | 1.1 | verkko -d /home/jiangheling/Luohh/True/Verkko/Hap --hifi /home/jiangheling/Luohh/True/Data/rice.fastq.gz --threads 30 --sto-run 30 100 24 --mer-run 30 100 24 --ovb-run 30 100 24 --ovs-run 30 100 24 --red-run 30 100 24 --mbg-run 30 100 24 --utg-run 30 100 24 --spl-run 30 100 24 --ali-run 30 100 24 --pop-run 30 100 24 --utp-run 30 100 24 --lay-run 30 100 24 --sub-run 30 100 24 --par-run 30 100 24 --cns-run 30 100 24 |
| LJA | 0.2 | lja -t 30 --diploid --reads CHM1-CHM13.fastq -o LJA |
| Rust-mdbg | 0.1.0 | rust-mdbg -k 21 --density 0.003 -l 14 --prefix rust-mdbg --threads 30 CHM1-CHM13.fastq |
| hifiams-meta | 0.2-r043 | Hifiasm-meta -t 32 -o output/asm sample.fq |
| metaFlye | 2.8.3 | --pacbio-hifi –meta –threads 32 --genome-size XG --out-dir output sample.fq |
